# Supplementary material for: A polymer‐based systemic hemostat for managing uncontrolled bleeding
Source: PubMed Central journal article supplement (PMC10189483; doi:10.1002/btm2.10516), 2023-04-13
Supplement: BTM2-8-e10516-s001.pdf [file BTM2-8-e10516-s001.pdf]

# **A polymer-based systemic hemostat for managing uncontrolled bleeding**

Yongsheng Gao,<sup>1,2</sup> Mayumi Ikeda-Imafuku,<sup>1,2</sup> Zongmin Zhao,<sup>1,2</sup> Maithili Joshi,<sup>1,2</sup> Samir Mitragotri<sup>1,2\*</sup>

<sup>1</sup> John A. Paulson School of Engineering and Applied Sciences, Harvard University, Allston, MA 02134, USA.

<sup>2</sup> Wyss Institute for Biologically Inspired Engineering at Harvard University, Boston, MA 02115, USA.

\*Corresponding author. Email: [mitragotri@seas.harvard.edu](mailto:mitragotri@seas.harvard.edu)

**SUPPLEMENTARY MATERIALS**

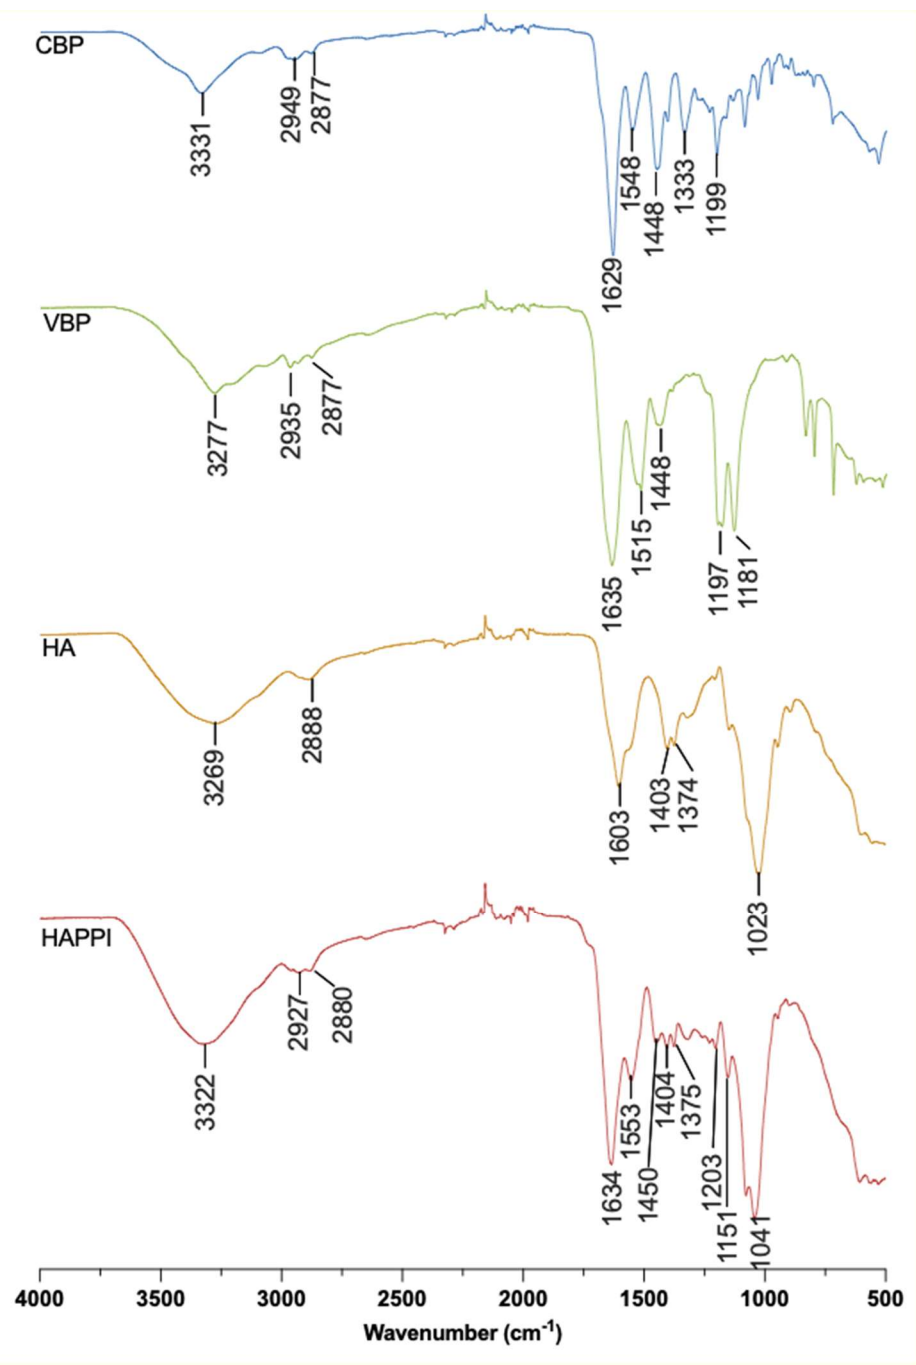

Figure S1. FTIR spectra of CBP, VBP, HA, HAPPI.

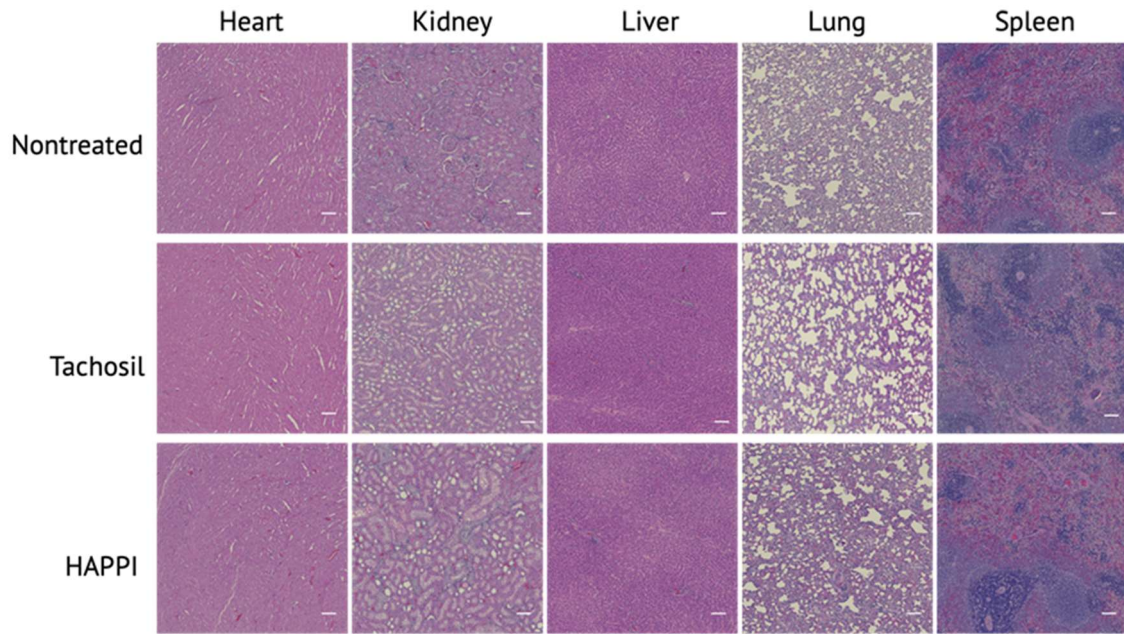

**Fig. S2. Representative graphs of hematoxylin and eosin (H&E) staining of vital organs of untreated rats, TachoSil-treated and HAPPI-treated rats with liver punch biopsy injuries. Organs were harvested at 2 hours after the injury. (Scale bar: 100 µm)**

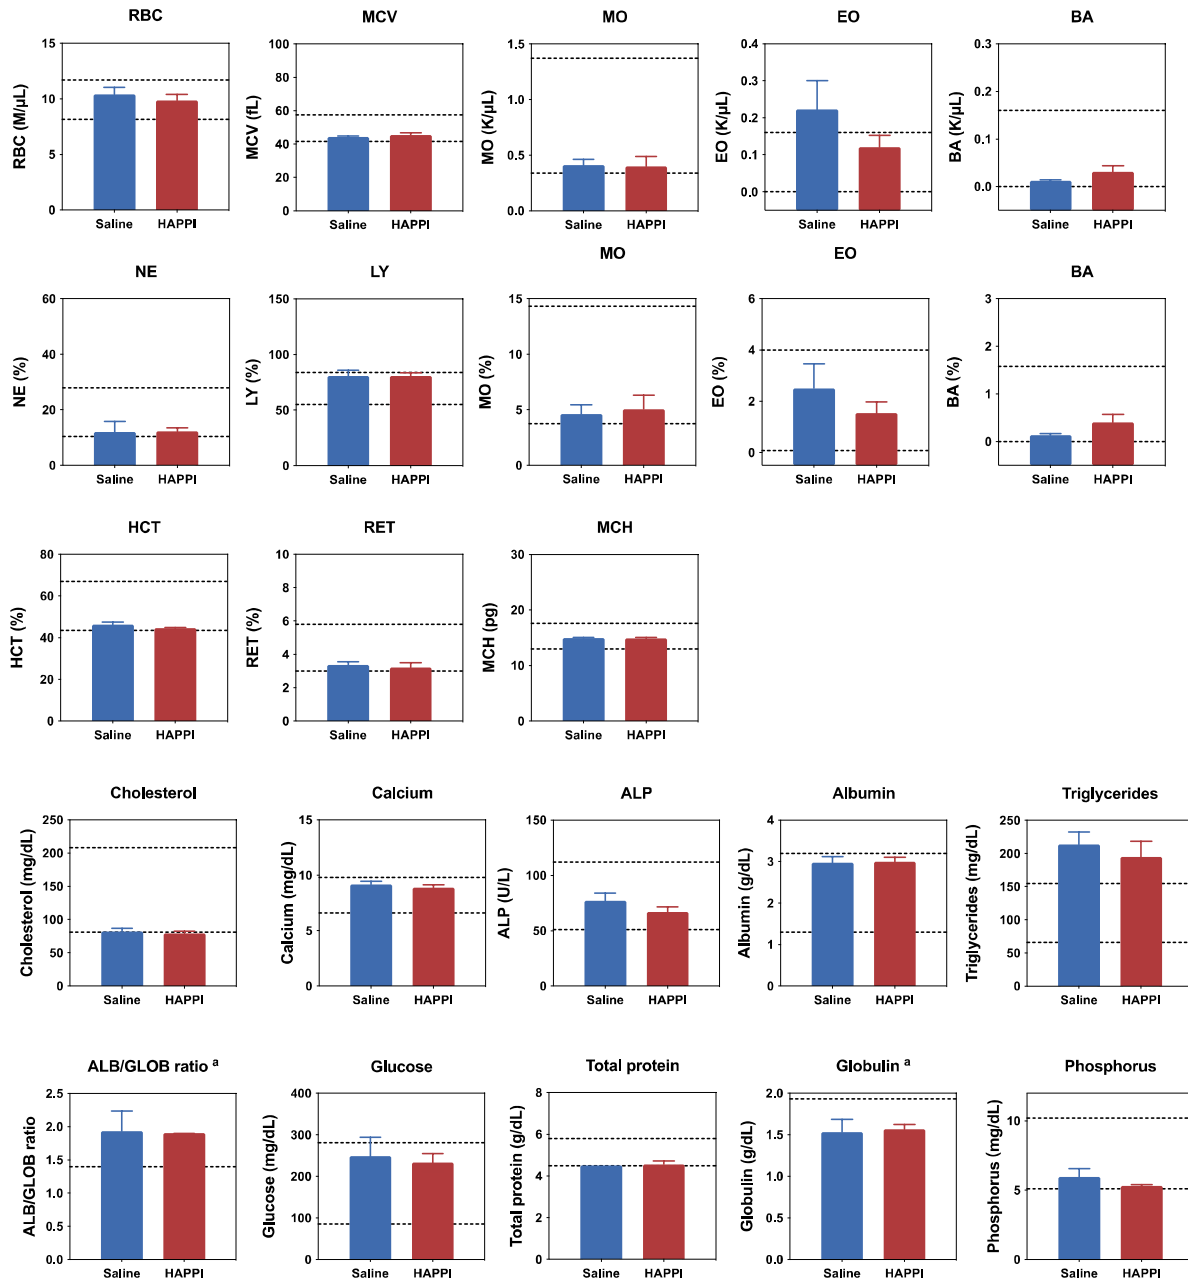

**Fig. S3. Hematology and serum chemistry analysis.** HAPPI was repeatedly dosed on Days 0, 30, 60 and 90 and blood was withdrawn at Day 97. Ab: RBC: red blood cells, MCH: mean corpuscular hemoglobin, MO: monocytes, EO: eosinophils, BE: basophils, MCV: mean corpuscular volume, HCT: hematocrit, RET: reticulocyte, ALP: alkaline phosphatase, ALB/GLOB ratio: albumin/globulin ratio. All data are mean  $\pm$  SD.  $n = 3$ . Dashed lines indicate established normal ranges (two lines) or values (one line).<sup>41-43</sup>
